# Supplementary material for: Maternal and congenital syphilis in Indigenous Peoples: a scoping review of the worldwide literature
Source: Springer Nature journal article supplement (doi:10.1186/s12939-023-01890-x), 2023-05-09
Supplement: MOESM2 [file 25337012]

## Additional File 2: Sources excluded following full-text review

| N  | Title                                                                                                                                                                       | Author, Year           | Publication (journal, site)   | Type | Reason for exclusion |
|----|-----------------------------------------------------------------------------------------------------------------------------------------------------------------------------|------------------------|-------------------------------|------|----------------------|
| 1  | Conocimientos, Actitudes y Prácticas sobre Prevención de Sífilis y VIH de Indígenas, Distrito Dr. Juan Eulogio Estigarribia, año 2014.                                      | Alfonso, 2016          | Rev. Inst. Med. Trop          | SP   | 1                    |
| 2  | Deteccão de sífilis adquirida em comunidades de difícil acesso da região Amazônia: desafio a ser superado com a utilização dos testes rápidos                               | Benzaken, 2009         | ENSP, Fiocruz                 | PhD  | 1                    |
| 3  | Expansion of HIV and syphilis into the Peruvian Amazon: a survey of four communities of an indigenous Amazonian ethnic group                                                | Bartlett, 2008         | Int. J. Infect. Dis.          | SP   | 1                    |
| 4  | Fulfilling prophecy? Sexually transmitted infections and HIV in Indigenous people in Western Australia.                                                                     | Wright, 2005           | Med. J. Aust.                 | SP   | 1                    |
| 5  | Hepatitis B virus, syphilis, and HIV seroprevalence in pregnant women and their male partners from six indigenous populations of the Peruvian Amazon Basin, 2007-2008       | Ormaeche, 2012         | Int. J. Infect. Dis.          | SP   | 1                    |
| 6  | Reproductive health, infertility and sexually transmitted infections in Indigenous women in a remote community in the Northern Territory.                                   | Kildea, 2000           | Aust N Z Public Health        | SP   | 1                    |
| 7  | Sexually Transmitted Diseases Among American Indians in Arizona: An Important Public Health Disparity.                                                                      | Winscott, 2010         | Public Health Rep             | SP   | 1                    |
| 8  | Was infectious syphilis being misclassified in remote Australian outbreaks? Evidence that informed modification of the national case definition                             | Preston-Thomas, 2015   | Commun Dis Intell             | SP   | 1                    |
| 9  | Condom use among Aboriginal people in Ontario, Canada.                                                                                                                      | Calzavara, 1998        | Int J STD AIDS                | SP   | 1                    |
| 10 | Human papillomavirus and other genital infections in indigenous women from Paraguay: a cross-sectional analytical study.                                                    | Mendoza, 2013          | BMC Infect Dis                | SP   | 1                    |
| 11 | Incident sexually transmitted infections and their risk factors in an aboriginal community in Australia: A population based cohort study.                                   | Miller, 2001           | Sex Transm Infect             | SP   | 1                    |
| 12 | Indigenous healers' beliefs and practices concerning sexually transmitted diseases.                                                                                         | Mulaudzi, 2006         | Curationis                    | SP   | 1                    |
| 13 | Diagnosis of Treponema pallidum and HIV infections and contact tracing in the Mbyá-Guaraní population of the Puerto Iguazú, Argentina. A cross-sectional study.             | Marx, 2019             | Trans R Soc Trop Med Hyg      | CA   | 4                    |
| 14 | Congenital syphilis - United States, 2003-2008.                                                                                                                             | CDC, 2010              | MMWR, CDC                     | RP   | 3                    |
| 15 | Epidemiology of an outbreak of infectious syphilis in Alberta.                                                                                                              | Romanowski, 1991       | Int J STD AIDS                | SP   | 1                    |
| 16 | Examination of a prenatal syphilis screening program, Alberta, Canada: 2010-2011                                                                                            | Plitt, 2016            | Can J Public Health           | SP   | 3                    |
| 17 | Hepatitis B virus, human immunodeficiency virus type-1, and syphilis among women attending prenatal clinics in Belize, Central America.                                     | Scott-Wright, 1997     | AM J Trop Med Hyg             | SP   | 1                    |
| 18 | HIV and syphilis serostatus of antenatals in traditional Maasai pastoralist communities in Kajiado District, Kenya: 1989-1992.                                              | Valadez, 1999          | Trop Doct                     | SP   | 1                    |
| 19 | Home-based counseling and testing for HIV and syphilis - an evaluation of acceptability and quality control, in remote Amazonas State, Brazil.                              | Ribeiro, 2015          | Sex Transm Infect             | SP   | 1                    |
| 20 | Sexually transmitted diseases in Australia: a decade of change. Epidemiology and surveillance.                                                                              | Mulhall, 1995          | Ann Acad Med Singap           | SP   | 1                    |
| 21 | Syphilis epidemiology and public health interventions in Western Australia from 1991 to 2009.                                                                               | Kwan, 2012             | Sex Health                    | SP   | 1                    |
| 22 | The Co-occurrence of Intimate Partner Violence and Syphilis among Pregnant Women in Bolivia.                                                                                | Díaz-Olavarrieta, 2009 | J Womens Health               | SP   | 1                    |
| 23 | Surveillance for gonorrhea and primary and secondary syphilis among adolescents, United States--1981-1991.                                                                  | Webster, 1993          | MMWR, CDC                     | RP   | 1                    |
| 24 | High prevalence of HIV and syphilis in a remote native community of the Peruvian Amazon.                                                                                    | Zavaleta, 2007         | Am J Trop Med Hyg.            | SP   | 1                    |
| 25 | High Prevalence of Sexually Transmitted Infections, and High-Risk Sexual Behaviors Among Indigenous Adolescents of the Comarca Ngäbe-Buglé, Panama.                         | Gabster, 2019          | Sexually Transmitted Diseases | SP   | 1                    |
| 26 | HIV, Chlamydia, Gonorrhea, and Primary and Secondary Syphilis among American Indians and Alaska Natives Within Indian Health Service Areas in the United States, 2007-2010. | Walker, 2015           | J Community Health            | SP   | 1                    |
| 27 | HIV, syphilis, and viral hepatitis among Latin American indigenous peoples and Afro-descendants: a systematic review.                                                       | Russel, 2019           | Rev Panam Salud Publica       | REV  | 2                    |
| 28 | Improving the accuracy of Aboriginal and non-Aboriginal disease notification rates using data linkage.                                                                      | Mak, 2008              | BMC Health Services Research  | SP   | 1                    |

|    |                                                                                                                                                                   |                     |                                                     |     |   |
|----|-------------------------------------------------------------------------------------------------------------------------------------------------------------------|---------------------|-----------------------------------------------------|-----|---|
| 29 | Increasing trends of sexually transmitted infections among American Indian/ Alaska natives, 2013-2017                                                             | Apostolou, 2020     | Sexually Transmitted Diseases                       | CA  | 1 |
| 30 | La treponematosi precolombina en Cuba.                                                                                                                            | Canosa, 2004        | Revista Médica Electrónica                          | SP  | 1 |
| 31 | Pinta, yaws, and venereal syphilis in Colombia.                                                                                                                   | Hopkins, 1977       | Int J Epidemiol.                                    | SP  | 1 |
| 32 | Prevalence and Correlates of a Diagnosis of Sexually Transmitted Infection Among Young Aboriginal and Torres Strait Islander People: A National Survey.           | Ward, 2016          | Sexually Transmitted Diseases                       | SP  | 1 |
| 33 | Prevalence of chlamydia, gonorrhoea, syphilis, and trichomonas in Aboriginal and Torres Strait Islander Australians: a systematic review and meta-analysis.       | Graham, 2016        | Sexual Health                                       | REV | 2 |
| 34 | Prevalence of HIV and syphilis and social behavior characteristics of native populations in Three Geographical Areas of Paraguay – 2011.                          | Aguilar, 2012       | Int. J. Infect. Dis.                                | CA  | 1 |
| 35 | Prevalence of Syphilis and Related Risk Behaviors Among Women in 5 Distinct Indigenous Populations in Paraguay                                                    | Aguilar, 2019       | Sexually Transmitted Diseases                       | SP  | 1 |
| 36 | Prevalência de anticorpos contra os agentes causadores da hepatite, malária, sífilis e toxoplasmose em cinco populações humanas distintas da Amazonia Brasileira. | Ferrazoni, 1982     | Rev. Inst. Med. trop. São paulo                     | SP  | 1 |
| 37 | Prevalencia de sífilis y características del comportamiento de los jóvenes indígenas del Paraguay, 2016                                                           | Ortiz, 2018         | Mem. Inst. Investig. Cienc. Salud                   | SP  | 1 |
| 38 | Racial misclassification of American Indians in Oklahoma State surveillance data for sexually transmitted diseases.                                               | Thoroughman, 2002   | Am J Epidemiol                                      | SP  | 1 |
| 39 | Doenças sexualmente transmissíveis e aids entre indígenas do Distrito Sanitário Especial Indígena do Mato Grosso do Sul de 2001 a 2005                            | Ferri, 2011         | Saúde Coletiva                                      | SP  | 1 |
| 40 | Prevalência de infecção por HIV, HTLV, VHB e de sífilis e clamídia em gestantes numa unidade de saúde terciária na Amazônia ocidental brasileira                  | Machado Filho, 2010 | Rev. Bras. Ginecol. Obstet.                         | SP  | 1 |
| 41 | Syphilis in pregnancies and vertical transmission as a public health problem                                                                                      | Loureiro, 2012      | J Nurs                                              | SP  | 1 |
| 42 | 'Brothel of the Pacific': Syphilis and the Urban Regulation of Laikini Wahine in Honolulu, 1855-75                                                                | Kindell, 2019       | Journal Pacific History                             | SP  | 1 |
| 43 | Pre-pregnancy predictors linked to miscarriage among Aboriginal and Torres Strait Islander women in North Queensland                                              | Campbell, 2011      | Australian and New Zealand Journal of Public Health | SP  | 1 |
| 44 | Field performance of a rapid point-of-care diagnostic test for antenatal syphilis screening in the Amazon region, Brazil                                          | Benzaken, 2011      | International Journal of STD & AIDS                 | SP  | 3 |
| 45 | Diagnosis of Treponema pallidum and HIV infections and contact tracing in the Mbyá-Guaraní population of the Puerto Iguazú, Argentina. A cross sectional study.   | Marx, 2019          | Trans R Soc Trop Med Hyg                            | CA  | 4 |

**Publication type:** MD=Master dissertation; PhD=PhD thesis; SP=Scientific paper; CA=Conference/Congress abstract; RP=Report; REV= Review (Systematic, others, meta-analysis);  
**Exclusion criteria:** 1=Does not analyze congenital or gestational syphilis; 2= Results of systematic review without additional or other contributions; 3=No specific results for indigenous people; 4= Publication with same data of another selected study.
