# Supplementary material for: Maternal and congenital syphilis in Indigenous Peoples: a scoping review of the worldwide literature
Source: Springer Nature journal article supplement (doi:10.1186/s12939-023-01890-x), 2023-05-09
Supplement: MOESM3 [file 25337012]

### Additional File 3: Data extraction instrument

|                                                                                                                                                                                                                                                                                                                                                                                                                                                                                                                                                                                                                                                                                                                                             |                    |                     |
|---------------------------------------------------------------------------------------------------------------------------------------------------------------------------------------------------------------------------------------------------------------------------------------------------------------------------------------------------------------------------------------------------------------------------------------------------------------------------------------------------------------------------------------------------------------------------------------------------------------------------------------------------------------------------------------------------------------------------------------------|--------------------|---------------------|
| <b>DATA EXTRACTION FORM – SCOPING REVIEW ON MATERNAL AND CONGENITAL SYPHILIS IN INDIGENOUS PEOPLES, 2021</b>                                                                                                                                                                                                                                                                                                                                                                                                                                                                                                                                                                                                                                |                    |                     |
| <b>ARTICLE IDENTIFICATION:</b>                                                                                                                                                                                                                                                                                                                                                                                                                                                                                                                                                                                                                                                                                                              |                    |                     |
| Title of the article:                                                                                                                                                                                                                                                                                                                                                                                                                                                                                                                                                                                                                                                                                                                       |                    |                     |
| Aim/purpose of the study:                                                                                                                                                                                                                                                                                                                                                                                                                                                                                                                                                                                                                                                                                                                   |                    |                     |
| Publication Journal:                                                                                                                                                                                                                                                                                                                                                                                                                                                                                                                                                                                                                                                                                                                        |                    |                     |
| First Author:                                                                                                                                                                                                                                                                                                                                                                                                                                                                                                                                                                                                                                                                                                                               | Number of authors: |                     |
| Institutional affiliation of the first author:                                                                                                                                                                                                                                                                                                                                                                                                                                                                                                                                                                                                                                                                                              |                    |                     |
| Institutional affiliation of the last author:                                                                                                                                                                                                                                                                                                                                                                                                                                                                                                                                                                                                                                                                                               |                    |                     |
| Publication year:                                                                                                                                                                                                                                                                                                                                                                                                                                                                                                                                                                                                                                                                                                                           |                    |                     |
| Data collection year:                                                                                                                                                                                                                                                                                                                                                                                                                                                                                                                                                                                                                                                                                                                       |                    |                     |
| Publication type; journal; publication language:                                                                                                                                                                                                                                                                                                                                                                                                                                                                                                                                                                                                                                                                                            |                    |                     |
| Study design: DCS=Descriptive, case series; CS=Cross-Sectional/Seroprevalence; E=Ecological, descriptive using surveillance data; D=Descriptive, outbreaks; CC=Case-Control; CH=Cohort; SR=Systematic review or meta-analysis; CT=Community trial; VR=Validity/reliability; CE=Costs-effectiveness (screening); QLQ=Qualitative/Quantitative (Case study and/or cross-sectional);                                                                                                                                                                                                                                                                                                                                                           |                    |                     |
| Study population (include all existing details - age range, area of residence):                                                                                                                                                                                                                                                                                                                                                                                                                                                                                                                                                                                                                                                             |                    |                     |
| Size of the study population (n):                                                                                                                                                                                                                                                                                                                                                                                                                                                                                                                                                                                                                                                                                                           |                    |                     |
| Continent; region (1-South America; 2-Central America; 3-North America; 4-Africa; 5-Asia; 6-Oceania):                                                                                                                                                                                                                                                                                                                                                                                                                                                                                                                                                                                                                                       |                    |                     |
| Country:                                                                                                                                                                                                                                                                                                                                                                                                                                                                                                                                                                                                                                                                                                                                    |                    |                     |
| Detailed location (region, state, county, etc.):                                                                                                                                                                                                                                                                                                                                                                                                                                                                                                                                                                                                                                                                                            |                    |                     |
| If in Brazil: Region                                                                                                                                                                                                                                                                                                                                                                                                                                                                                                                                                                                                                                                                                                                        | UF:                | County/City:        |
| If in Brazil: Indigenous Sanitary District                                                                                                                                                                                                                                                                                                                                                                                                                                                                                                                                                                                                                                                                                                  | Indigenous Land:   | Other informations: |
| Race/color and ethnicity:                                                                                                                                                                                                                                                                                                                                                                                                                                                                                                                                                                                                                                                                                                                   |                    |                     |
| Source of information on race/color and ethnicity (secondary database – Health Information Systems (HIS), medical records, registries, etc.; primary data - interviews, others):                                                                                                                                                                                                                                                                                                                                                                                                                                                                                                                                                            |                    |                     |
| Way of assigning race and/or ethnicity to the pregnant woman or child (self-declaration, heteroclassification):                                                                                                                                                                                                                                                                                                                                                                                                                                                                                                                                                                                                                             |                    |                     |
| Topics covered: HT=Historical report of gestational and congenital syphilis in indigenous populations; DQ=Data quality related to congenital and gestational syphilis in indigenous peoples; DAH= Diagnostic, provision, access, and use of health services related to gestational and congenital syphilis in indigenous peoples; DF=Incidence and prevalence of congenital and gestational syphilis in indigenous populations and health inequities; DOC=Determinants of outcomes of congenital syphilis in indigenous populations; DT=Determinants of congenital or gestational syphilis in indigenous populations; and IP=Impacts of social and health public policies on congenital and gestational syphilis in indigenous populations. |                    |                     |
| Statistical analysis model and relevant aspects of the method:                                                                                                                                                                                                                                                                                                                                                                                                                                                                                                                                                                                                                                                                              |                    |                     |
| Ethical aspects:                                                                                                                                                                                                                                                                                                                                                                                                                                                                                                                                                                                                                                                                                                                            |                    |                     |
| Main results:                                                                                                                                                                                                                                                                                                                                                                                                                                                                                                                                                                                                                                                                                                                               |                    |                     |
| Determinants/risk factors/risk markers/Intervention studied and outcome of associations (frequency measures, crude, adjusted associations, point estimates and CIs, and adjustment variables):                                                                                                                                                                                                                                                                                                                                                                                                                                                                                                                                              |                    |                     |
| Critical analysis:                                                                                                                                                                                                                                                                                                                                                                                                                                                                                                                                                                                                                                                                                                                          |                    |                     |
| Comments/Observations:                                                                                                                                                                                                                                                                                                                                                                                                                                                                                                                                                                                                                                                                                                                      |                    |                     |
| Date of extraction:                                                                                                                                                                                                                                                                                                                                                                                                                                                                                                                                                                                                                                                                                                                         |                    |                     |
| Responsible for extraction:                                                                                                                                                                                                                                                                                                                                                                                                                                                                                                                                                                                                                                                                                                                 |                    |                     |
